# Supplementary material for: Heat and Cities: Using vehicle-borne sensing to capture hyperlocal spatio-temporal urban thermal complexities
Source: Royal Society of Chemistry journal article supplement (doi:10.1039/d5va00332f), 2026-01-01
Supplement: d5va00332f1.pdf [file d5va00332f1.pdf]

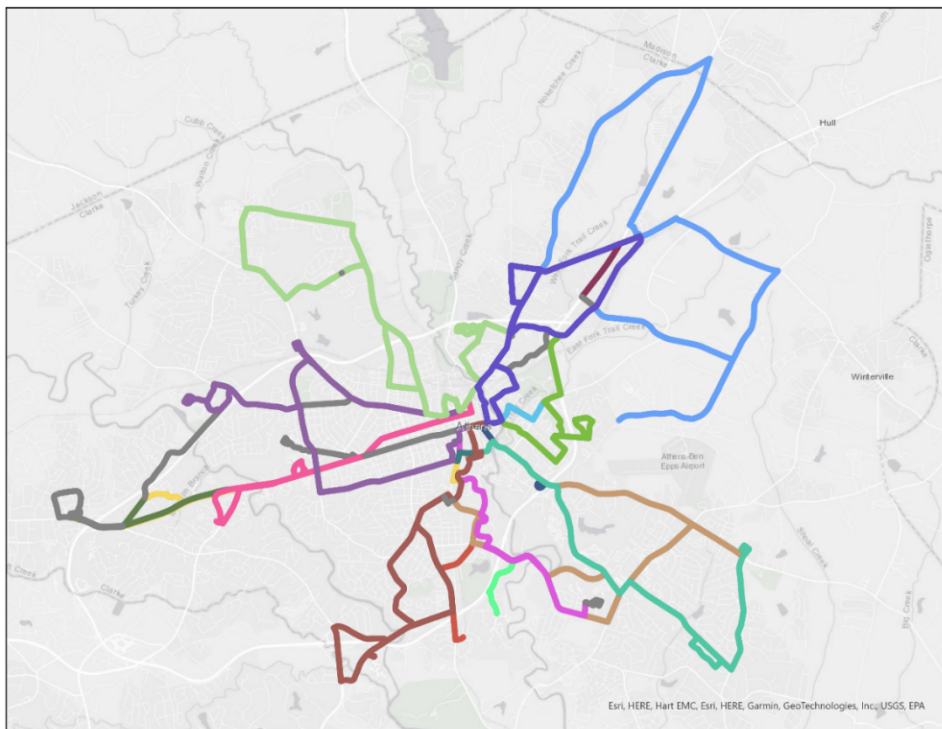

(a)

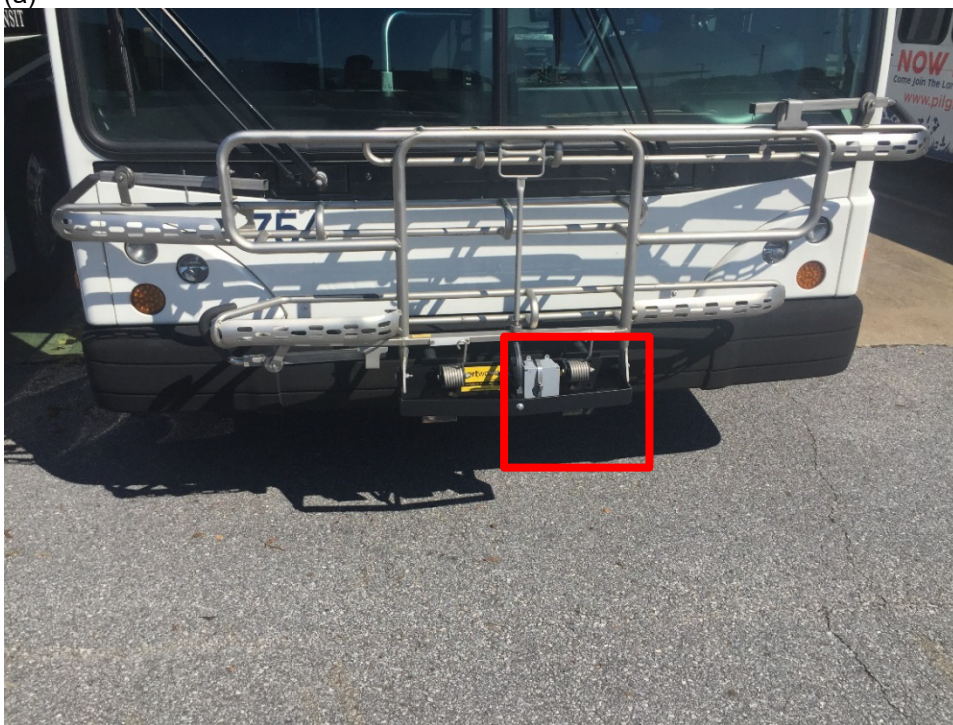

(b)

**Fig. S1** Data collection related images, (1a) Map of all bus routes from Athens and UGA Transit (Colors represent different bus routes), (1b) Sensor on bus bike rack

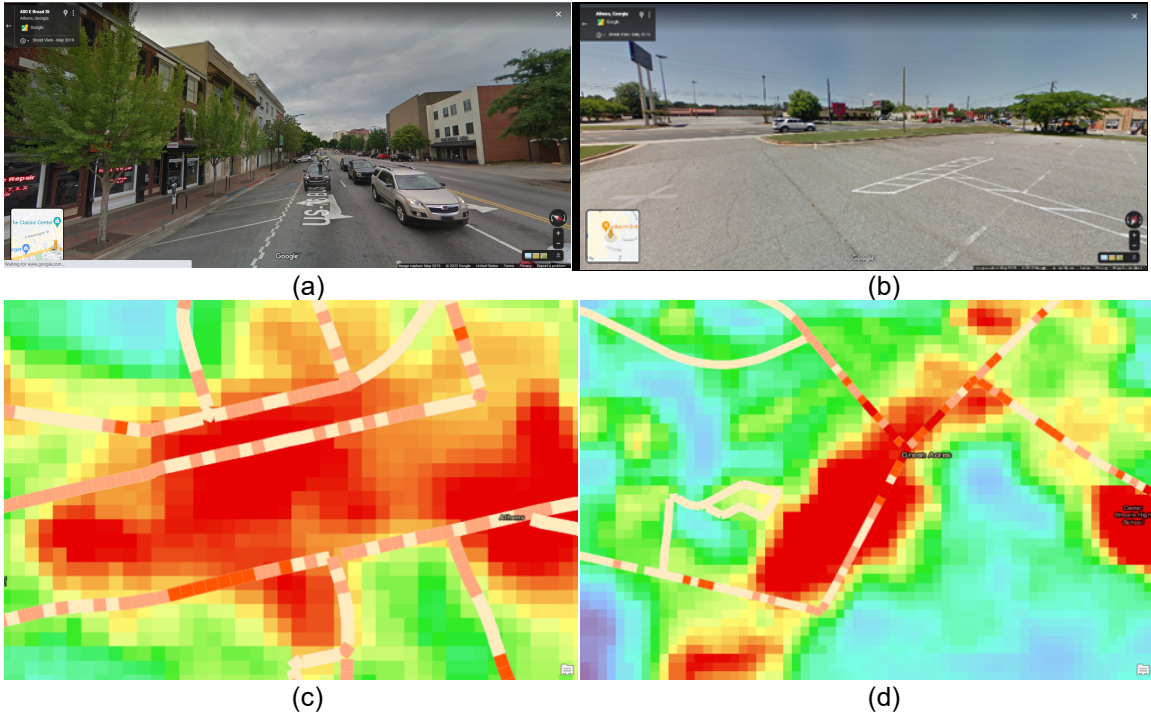

**Fig. S2.** Google Street View images of (a) Downtown, and (b) shopping plazas, and Hotspots overlaying LST images of (c) Downtown, and (d) the plaza

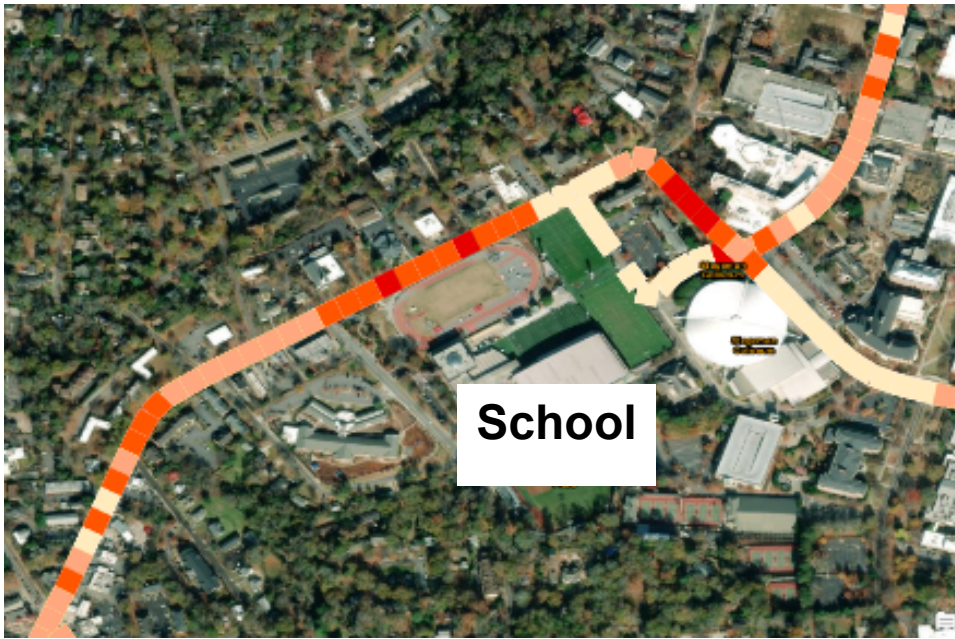

(a)

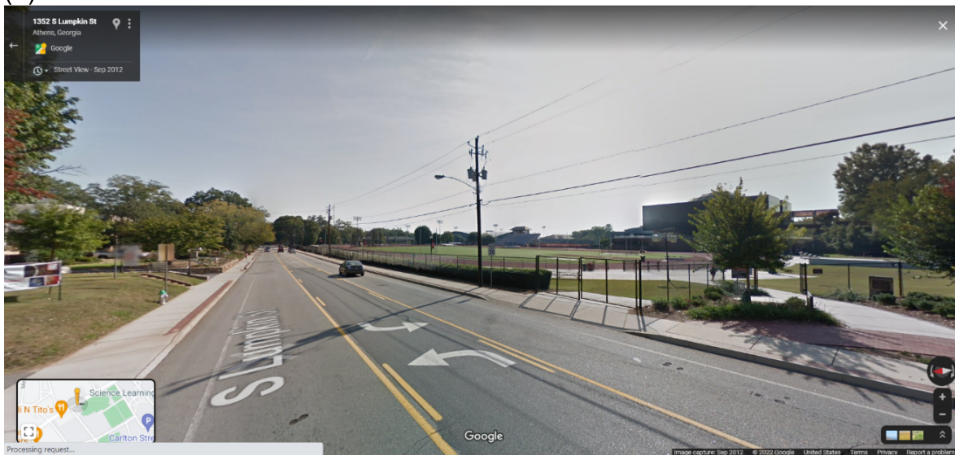

(b)

**Fig. S3.** Elementary School with athletic complex near the campus (a) Hotspot Map, (b) corresponding Google Street View image

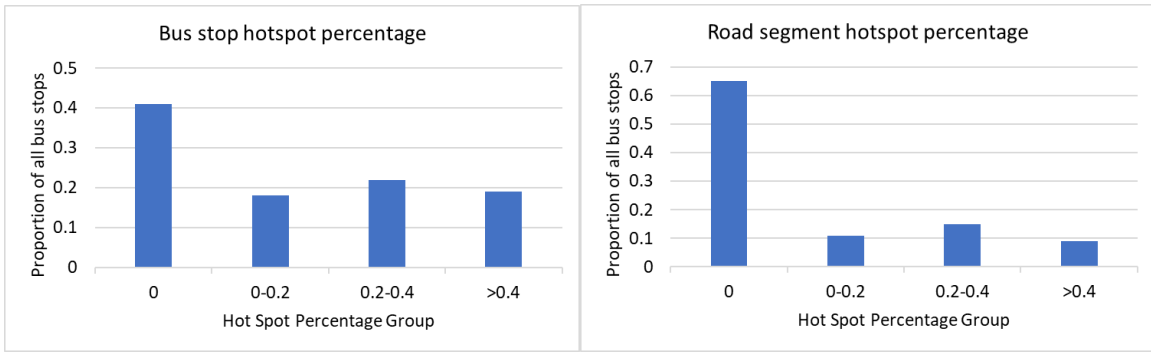

**Fig. S4** Chances of a bus stop being a hotspot (left) vs. Chances of a road segment being a hotspot (right) with corresponding hotspot percentage of bus stops

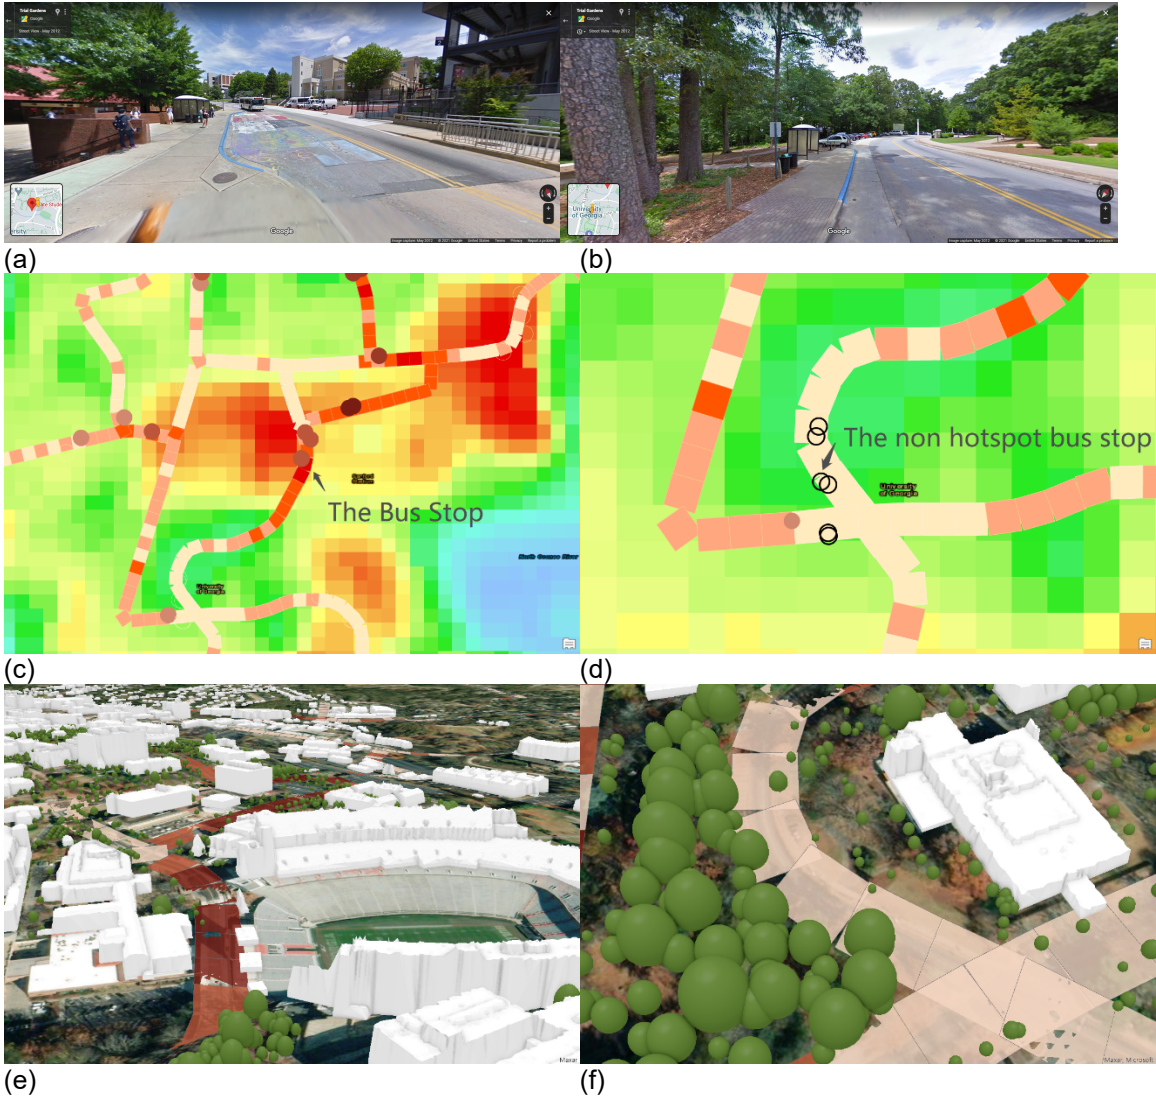

**Fig. S5** Google Street View images of (a) a hotspot bus stop, and (b) a non-hotspot bus stop, and LST images of (c) a hotspot bus stop, and (d) a non-hotspot bus stop, with 3D city model of (e) a hotspot bus stop, and (f) a non-hotspot bus stop

**Table S1.** Athens Weather Normals from the NWS/FAA automated surface observing station at Ben Apps Airport

| Month | Mean Daily Max Temperature (°C) | Standard Deviation (°C) |
|-------|---------------------------------|-------------------------|
| 5     | 27.6                            | 1.3                     |
| 6     | 31.5                            | 1.8                     |
| 7     | 33                              | 1.6                     |
| 8     | 32.1                            | 1.7                     |
| 9     | 28.9                            | 1.3                     |
| 10    | 23.5                            | 1.4                     |
